# Supplementary material
Source: HighWire-hosted journal article supplement (https://bmjopensem.bmj.com/content/6/1/e000874)
Supplement: inline-supplementary-material-1 [file inline-supplementary-material-1.pdf]

# Thigh-worn Accelerometry for measuring Movement and Posture across the 24 hour cycle: A Scoping Review and Expert Statement

## Appendix 1 - Search Strategies

**Table S1-1: MEDLINE Search Strategy**

|                                                                                            |                                                        |
|--------------------------------------------------------------------------------------------|--------------------------------------------------------|
| <b>Database</b>                                                                            | MEDLINE                                                |
| <b>Platform</b>                                                                            | OvidSP 1946 - present                                  |
| <b>Row #</b>                                                                               | <b>Terms</b>                                           |
| <b>1</b>                                                                                   | activpal.ti,ab,mp.                                     |
| <b>2</b>                                                                                   | actigraph.ti,ab,mp.                                    |
| <b>3</b>                                                                                   | axivity.ti,ab,mp.                                      |
| <b>4</b>                                                                                   | 1 OR 2 OR 3                                            |
| <b>5</b>                                                                                   | accelerom*.ti,ab,mp.                                   |
| <b>6</b>                                                                                   | inclinomet*.ti,ab,mp.                                  |
| <b>7</b>                                                                                   | accelatory.ti,ab,mp.                                   |
| <b>8</b>                                                                                   | 5 OR 6 OR 7                                            |
| <b>9</b>                                                                                   | observational.ab,mp.                                   |
| <b>10</b>                                                                                  | Thigh.ab,mp.                                           |
| <b>11</b>                                                                                  | cohort.ab,mp.                                          |
| <b>12</b>                                                                                  | cross-sectional.ab,mp.                                 |
| <b>13</b>                                                                                  | case-control.ab,mp.                                    |
| <b>14</b>                                                                                  | case series.ab,mp.                                     |
| <b>15</b>                                                                                  | 9 OR 10 OR 11 OR 12 OR 13 OR 14                        |
| <b>16</b>                                                                                  | 8 AND 15                                               |
| <b>17</b>                                                                                  | 4 OR 16                                                |
| <b>18</b>                                                                                  | Limit 17 to humans                                     |
| <b>Filters</b>                                                                             | Humans: yes                                            |
| <b>Restrictions</b>                                                                        | Date restrictions: none<br>Language restrictions: none |
| #: row number; *: truncate; <b>ab</b> : abstract; <b>mp</b> : keywords; <b>ti</b> : title. |                                                        |

**Table S1-2: Embase Search Strategy**

|                                                                                            |                                                        |
|--------------------------------------------------------------------------------------------|--------------------------------------------------------|
| <b>Database</b>                                                                            | Embase                                                 |
| <b>Platform</b>                                                                            | OvidSP 1947 - present                                  |
| <b>Row #</b>                                                                               | <b>Terms</b>                                           |
| <b>1</b>                                                                                   | activpal (ti,ab,mp)                                    |
| <b>2</b>                                                                                   | actigraph (ti,ab,mp)                                   |
| <b>3</b>                                                                                   | axivity (ti,ab,mp)                                     |
| <b>4</b>                                                                                   | 1 OR 2 OR 3                                            |
| <b>5</b>                                                                                   | accelerometer (ti,ab,mp)                               |
| <b>6</b>                                                                                   | inclinomet* (ti,ab,mp)                                 |
| <b>7</b>                                                                                   | accelatory (ti,ab,mp)                                  |
| <b>8</b>                                                                                   | 5 OR 6 OR 7                                            |
| <b>9</b>                                                                                   | observational (ab,mp)                                  |
| <b>10</b>                                                                                  | thigh (ab,mp)                                          |
| <b>11</b>                                                                                  | cohort (ab,mp)                                         |
| <b>12</b>                                                                                  | cross-sectional (ab,mp)                                |
| <b>13</b>                                                                                  | case-control (ab,mp)                                   |
| <b>14</b>                                                                                  | case series (ab,mp)                                    |
| <b>15</b>                                                                                  | 9 OR 10 OR 11 OR 12 OR 13 OR 14                        |
| <b>16</b>                                                                                  | 4 AND 15                                               |
| <b>17</b>                                                                                  | 8 AND 15                                               |
| <b>18</b>                                                                                  | 16 OR 17                                               |
| <b>19</b>                                                                                  | Limit 18 to humans                                     |
| <b>Filters</b>                                                                             | Humans: yes                                            |
| <b>Restrictions</b>                                                                        | Date restrictions: none<br>Language restrictions: none |
| #: row number; *: truncate; <b>ab</b> : abstract; <b>mp</b> : keywords; <b>ti</b> : title. |                                                        |
